# Supplementary material for: Developmental language disorders in preschool children after high exposure to perfluoroalkyl substances from contaminated drinking water in Ronneby, Sweden
Source: PubMed Central journal article supplement — Environ Epidemiol. 2022 Dec 14;7(1):e233. doi: 10.1097/EE9.0000000000000233 (PMC9916036; doi:10.1097/ee9.0000000000000233), 2022-12-14
Supplement: ee9-7-e233-s001.pdf [file ee9-7-e233-s001.pdf]

## Supplement

### “Developmental language disorders in preschool children after high exposure to perfluoroalkyl substances from contaminated drinking water in Ronneby, Sweden”

**Figure S1.** Directed acyclic graph over the association between residential address and language difficulties via cumulative prenatal PFAS exposure. The variables parity, maternal age and socioeconomic status were considered as confounders in the analyses. The variable gestational age was considered as a risk factor and was not accounted for in the analyses.

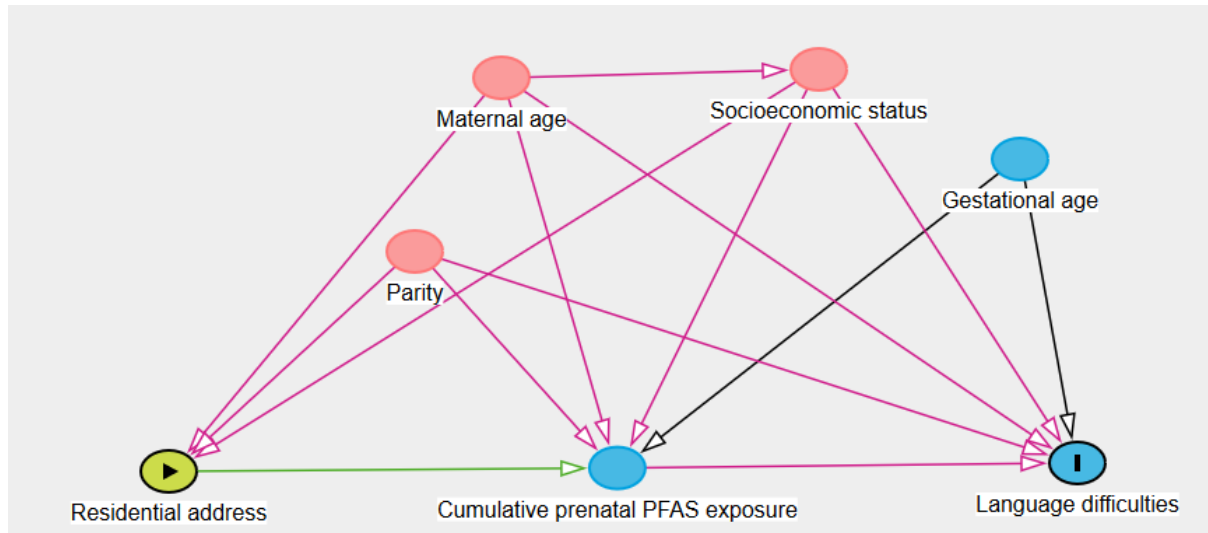

**Table S1.** Diagnosis from ICD-10 Swedish version including the outcome diagnoses by a speech- and language pathologist.

| ICD-10 diagnosis | Diagnose text Swedish version                                |
|------------------|--------------------------------------------------------------|
| F800             | Specifik störning av artikulationsförmågan                   |
| F800A            | Fonologisk språkstörning                                     |
| F800B            | Utvecklingsförsening av oralmotorik                          |
| F800C            | Dyslali och liknande artikulationsavvikelse                  |
| F801             | Expressiv språkstörning                                      |
| F801A            | Grammatisk språkstörning                                     |
| F801B            | Fonologisk och grammatisk språkstörning                      |
| F801C            | Semantisk språkstörning                                      |
| F802             | Impressiv språkstörning                                      |
| F802A            | Impressiv språkförsening (ord och satsförståelse)            |
| F802B            | Generell språkförsening (impressiv och expressiv)            |
| F802C            | Pragmatisk språkförsening                                    |
| F808             | Andra specificerade störningar av tal- och språkutvecklingen |
| F808A            | Prosodisk talstörning                                        |
| F808B            | Läspning                                                     |
| F808C            | R-fel                                                        |

|       |                                                              |
|-------|--------------------------------------------------------------|
| F808D | Generell interdentalism                                      |
| F808W | Andra specificerade störningar av tal- och språkutvecklingen |
| F809  | Störning av tal- och språkutvecklingen, ospecificerad        |
| F985  | Stamning                                                     |
| F985A | Stamning                                                     |
| F985B | Stamning                                                     |
| F985W | Annan specificerad störning av typ stamning                  |
| F985X | Ospecificerad störning av typ stamning                       |
| F986  | Skenande tal                                                 |
| F986A | Skenande tal, cluttering                                     |
| F986W | Annan specificerad störning av typ skenande tal              |
| R470B | Pragmatisk språkstörning                                     |
| R470C | Annan specificerad språkstörning                             |
| R470D | Ospecificerad språkstörning                                  |
| R471  | Dysartri och anartri                                         |
| R471A | Dysartri                                                     |
| R478  | Andra och icke specificerade talstörningar                   |
| R478C | Kompensatoriskt artikulationssätt                            |
| R478W | Annan specificerad talstörning                               |
| R478X | Talstörning, ospecificerad                                   |
| R482A | Oral apraxi                                                  |
| R482B | Pragmatisk språkstörning                                     |

**Table S2.** Diagnosis from ICD-10 Swedish version including the outcome diagnoses by a speech- and language pathologist divided into three subgroups for a sensitivity analysis.

| <b>Expressive language disorder</b> | <b>Mixed receptive-expressive language disorder</b> | <b>Other developmental disorders of speech and language fluency disorders</b> |
|-------------------------------------|-----------------------------------------------------|-------------------------------------------------------------------------------|
| F800                                | F802                                                | F808                                                                          |
| F800A                               | F802A                                               | F808A                                                                         |
| F800B                               | F802B                                               | F808B                                                                         |
| F800C                               | F802C                                               | F808C                                                                         |
| F801                                | F809                                                | F808D                                                                         |
| F801A                               | R470B                                               | F808W                                                                         |
| F801B                               | R470C                                               | F985                                                                          |
| F801C                               | R470D                                               | F985A                                                                         |
| R471                                |                                                     | F985B                                                                         |
| R471A                               |                                                     | F985W                                                                         |
| R478                                |                                                     | F985X                                                                         |
| R478C                               |                                                     | F986                                                                          |
| R478W                               |                                                     | F986A                                                                         |
| R478X                               |                                                     | F986W                                                                         |
| R482A                               |                                                     |                                                                               |
| R482B                               |                                                     |                                                                               |
